# Supplementary material
Source: PubMed Central journal article supplement (PMC2875179)
Supplement: NIHMS27425-supplement-6.pdf [file NIHMS27425-supplement-6.pdf]

# Declaration of competing financial interests

JOURNAL:

MANUSCRIPT NUMBER:

MANUSCRIPT TITLE:

Please check one of the following:

1. I declare that the authors have no competing interests as defined by Nature Publishing Group, or other interests that might be perceived to influence the results and discussion reported in this paper.
2. The authors have competing interests as defined by Nature Publishing Group, or other interests that might be perceived to influence the results and discussion reported in this paper.

If you have checked 2, please specify the competing interests:

SIGNATURE:  \_\_\_\_\_

NAME IN BLOCK CAPITALS:

DATE: 4th July 2009

The Nature journals' competing financial interests policy is defined, and further details of our procedures are explained, at:

[http://www.nature.com/authors/editorial\\_policies/competing.html](http://www.nature.com/authors/editorial_policies/competing.html)
