# Supplementary material
Source: PubMed Central journal article supplement (PMC2875179)

# nature

The road less taken:  
A model of vacillation

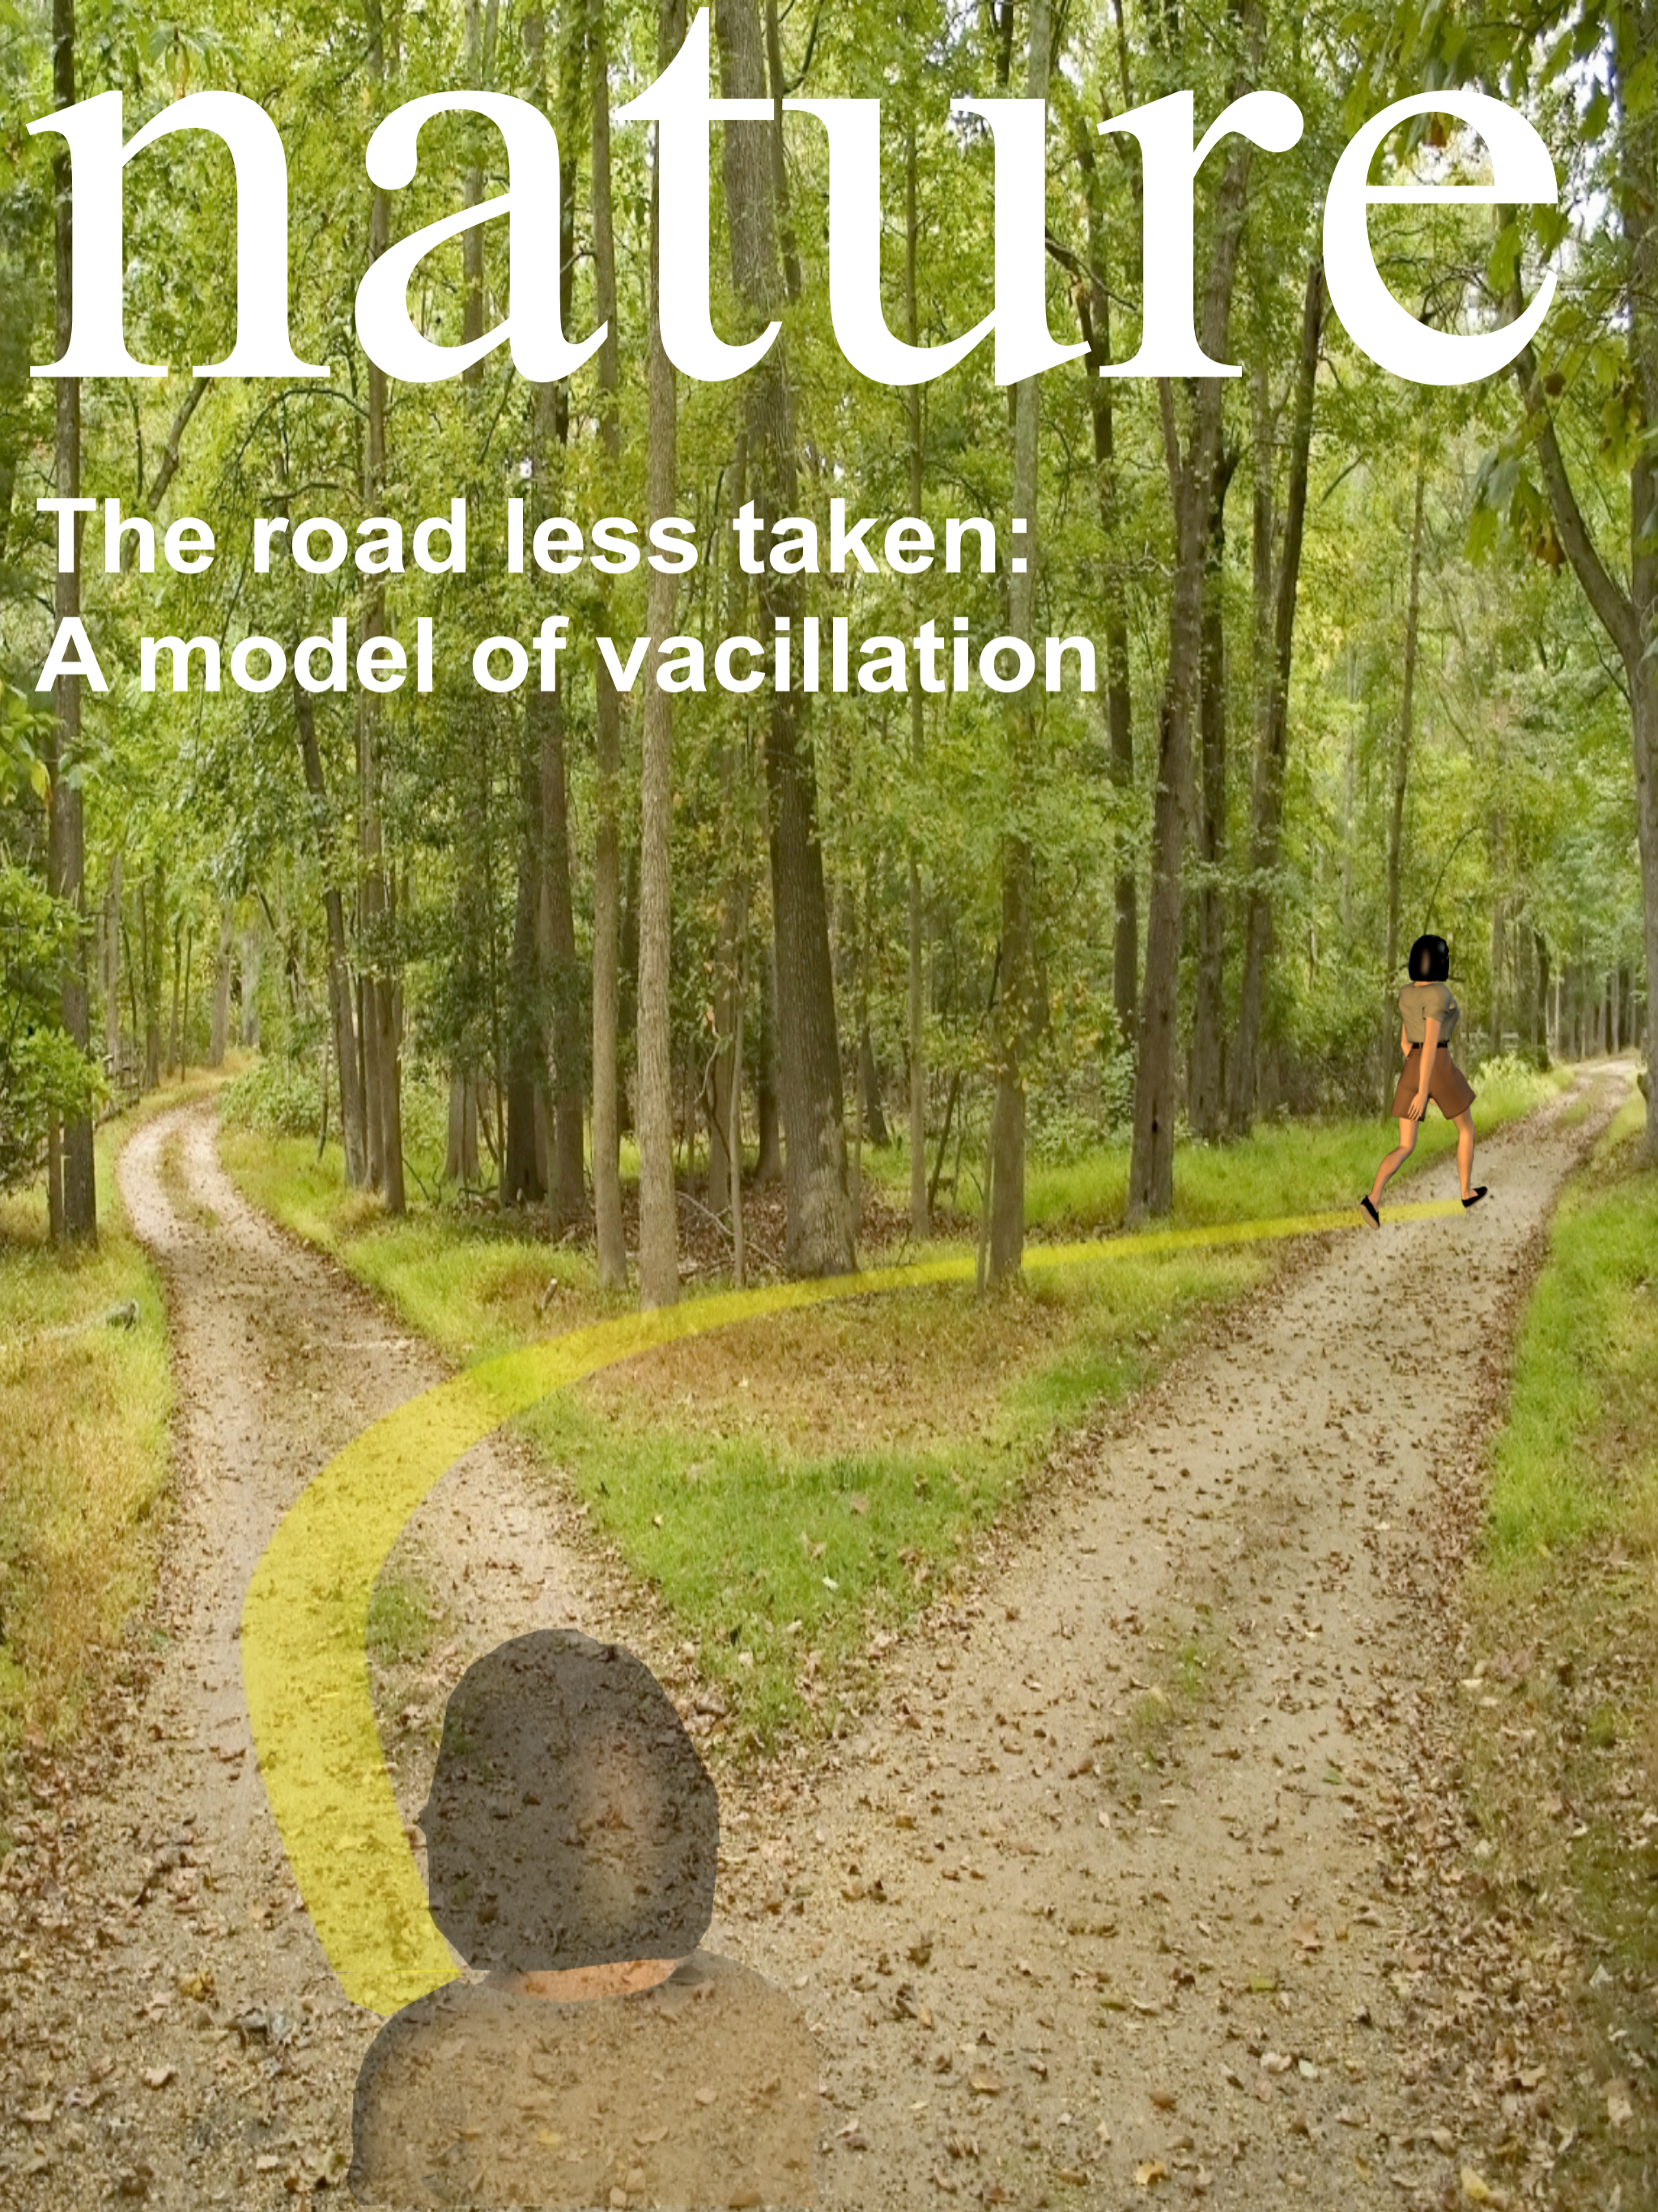

Supplement: NIHMS27425-supplement-3.pdf [file NIHMS27425-supplement-3.pdf]
